# Supplementary material
Source: PubMed Central journal article supplement (PMC2726371)
Supplement: 0903190106_0903190106SI.pdf [file 0903190106_0903190106SI.pdf]

# Supporting Information

Jamtveit et al. 10.1073/pnas.0903190106

Table S1. All research units: data from 2007 or 2008

| Origin       | Institution                                                | Total staff* | Support†  | Scientific‡ | % Support |      |
|--------------|------------------------------------------------------------|--------------|-----------|-------------|-----------|------|
| Norway       |                                                            |              |           |             |           |      |
| Centers      |                                                            |              |           |             |           |      |
|              | Norwegian Center for Addiction Research                    | UoO          | 19.4      | 3.5         | 15.9      | 18.0 |
|              | Center for Advanced Study of Theoretical Linguistics       | UoT          | 20        | 2           | 18        | 10.0 |
|              | Physics of Geological Processes                            | UoO          | 43        | 6           | 37        | 14.0 |
|              | The Bjerknes Center for Climate Research                   | UoB          | 92.4      | 18.7        | 73.7      | 20.2 |
|              | The Simula Research Laboratory                             | Oslo         | 104       | 17          | 87        | 16.3 |
| Departments  |                                                            |              |           |             |           |      |
|              | Department of Geoscience                                   | UoO          | 120       | 26          | 94        | 21.7 |
|              | Department of Geology                                      | UoB          | 120       | 35          | 85        | 29.2 |
|              | Department of Biology                                      | UoO          | 141       | 35          | 106       | 24.8 |
|              | Department of Physics                                      | UoO          | 164       | 39          | 125       | 23.8 |
|              | Department of Chemistry                                    | UoO          | 174       | 45          | 129       | 25.9 |
| Faculties    |                                                            |              |           |             |           |      |
|              | Faculty of Law                                             | UoO          | 206       | 73          | 133       | 35.4 |
|              | Faculty of Social Sciences                                 | UoB          | 293       | 82          | 211       | 28.0 |
|              | Faculty of Humanities                                      | NTNU         | 374       | 81          | 293       | 21.7 |
|              | Faculty of Social Sciences                                 | UoO          | 463       | 129         | 334       | 27.9 |
|              | Faculty of Humanities                                      | UoB          | 500       | 108         | 392       | 21.6 |
|              | Faculty of Medicine                                        | NTNU         | 623       | 235         | 388       | 37.7 |
|              | Faculty of Natural Sciences and Technology                 | NTNU         | 678       | 181         | 497       | 26.7 |
|              | Faculty of Mathematics and Natural Sciences                | UoB          | 700       | 210         | 490       | 30.0 |
|              | Faculty of Humanities                                      | UoO          | 817       | 235         | 582       | 28.8 |
|              | Faculty of Medicine                                        | UoO          | 1,030     | 429         | 601       | 41.7 |
|              | Faculty of Mathematics and Natural Sciences                | UoO          | 1,300     | 356         | 944       | 27.4 |
| Universities |                                                            |              |           |             |           |      |
|              | University of Agder                                        |              | 870       | 345         | 525       | 39.7 |
|              | Norwegian University of Life Sciences                      |              | 940       | 364         | 576       | 38.7 |
|              | University of Stavanger                                    |              | 949       | 359         | 590       | 37.8 |
|              | University of Tromsø                                       |              | 2,098     | 1,006       | 1,092     | 48.0 |
|              | University of Bergen                                       |              | 3,327     | 1,305       | 2,022     | 39.2 |
|              | The Norwegian University of Science and Technology         |              | 4,493     | 1,808       | 2,685     | 40.2 |
|              | University of Oslo                                         |              | 5,938     | 2,611       | 3,327     | 44.0 |
| Denmark      |                                                            |              |           |             |           |      |
|              | IT University of Copenhagen                                |              | 148       | 63          | 85        | 42.6 |
|              | Roskilde University                                        |              | 850       | 339         | 511       | 39.9 |
|              | Copenhagen Business School                                 |              | 1,218     | 544         | 674       | 44.7 |
|              | Aalborg University                                         |              | 2,203     | 947         | 1,256     | 43.0 |
|              | University of Southern Denmark                             |              | 2,592     | 1,145       | 1,447     | 44.2 |
|              | Technical University of Denmark                            |              | 4,140     | 2,004       | 2,136     | 48.4 |
|              | Aarhus University                                          |              | 6,215     | 2,996       | 3,219     | 48.2 |
|              | University of Copenhagen                                   |              | 7,835     | 3,951       | 3,884     | 50.4 |
| Sweden       |                                                            |              |           |             |           |      |
|              | Stockholm School of Economics                              |              | 300       | 44          | 256       | 14.7 |
|              | Vaxjö University                                           |              | 1,200     | 335         | 865       | 27.9 |
|              | Karlstad University                                        |              | 1,080     | 324         | 756       | 30.0 |
|              | Luleå University of Technology                             |              | 2,114     | 809         | 1,305     | 38.3 |
|              | Chalmers University of Technology                          |              | 2,137     | 723         | 1,414     | 33.8 |
|              | Royal Institute of Technology                              |              | 2,795     | 901         | 1,894     | 32.2 |
|              | The Swedish University of Agricultural Sciences            |              | 3,113     | 1,294       | 1,819     | 41.6 |
|              | Linköping University                                       |              | 3,454     | 1,286       | 2,168     | 37.2 |
|              | Göteborg University                                        |              | 4,713     | 1,757       | 2,956     | 37.3 |
|              | Stockholm University                                       |              | 5,000     | 1,650       | 3,350     | 33.0 |
|              | Umeå University                                            |              | 5,264     | 1,761       | 3,503     | 33.5 |
|              | Lund University                                            |              | 5,329     | 2,058       | 3,271     | 38.6 |
|              | Karolinska Institute                                       |              | 6,000     | 2,382       | 3,618     | 39.7 |
|              | Uppsala University                                         |              | 6,000     | 2,187       | 3,813     | 36.5 |
| Other        |                                                            |              |           |             |           |      |
|              | Imperial College London (U.K.)                             |              | 2,016     | 873         | 1,143     | 43.3 |
|              | University of Bern (Switzerland)                           |              | 3,322     | 1,303       | 2,019     | 39.2 |
|              | Université Paris-Sud 11 (France)                           |              | 5,200     | 2,200       | 3,000     | 42.3 |
|              | ETH-Zürich (Switzerland)                                   |              | 6,408     | 2,367       | 4,041     | 36.9 |
|              | Tokyo University (Japan)                                   |              | 7,318     | 3,364       | 3,954     | 46.0 |
|              | Edinburgh University (U.K.)                                |              | 7,691     | 3,450       | 4,241     | 44.9 |
|              | Oxford University (U.K.)                                   |              | 8,242     | 3,958       | 4,284     | 48.0 |
|              | Manchester University (U.K.)                               |              | 11,472    | 5,593       | 5,879     | 48.8 |
|              | Los Alamos National Laboratory (U.S.)                      |              | 11,949    | 6,962       | 4,987     | 58.3 |
|              | Centre National de la recherche scientifique (CNRS-France) |              | 26,000    | 14,400      | 11,600    | 55.4 |
|              | Health unit                                                |              |           |             |           |      |
|              | National Health System (U.K.)                              |              | 1,360,000 | 1,130,000   | 230,000   | 83.1 |

UoO, University of Oslo; UoB, University of Bergen; NTNU, The Norwegian University of Science and Technology; UoT, University of Tromsø.

\*Total staff in human years, including postgrads in paid positions.

†Support staff includes all nonscientific personnel.

‡Scientific personnel includes research and teaching staff.

Table S2. Norwegian universities through time

|                                                    | Year                 | Total staf* | Support† | Scientific‡ | % Support |
|----------------------------------------------------|----------------------|-------------|----------|-------------|-----------|
| University of Oslo                                 | 1910                 | 150         | 25       | 125         | 16.7      |
|                                                    | 1960                 | 840         | 390      | 450         | 46.4      |
|                                                    | 1970                 | 2,250       | 1,050    | 1,200       | 46.7      |
|                                                    | 1990                 | 3,050       | 1,550    | 1,550       | 50.8      |
|                                                    | 1991                 | 3,286       | 1,743.8  | 1,542.2     | 53.1      |
|                                                    | 1992                 | 3,597       | 1,936    | 1,661       | 53.8      |
|                                                    | 1993                 | 3,789       | 2,098.6  | 1,690.4     | 55.4      |
|                                                    | 1994                 | 4,180       | 2,241.4  | 1,938.6     | 53.6      |
|                                                    | 1995                 | 4,347       | 2,348.2  | 1,998.8     | 54.0      |
|                                                    | 1996                 | 4,471       | 2,407.4  | 2,063.6     | 53.8      |
|                                                    | 1997                 | 4,539       | 2,411.6  | 2,127.4     | 53.1      |
|                                                    | 1998                 | 4,494       | 2,353.4  | 2,140.6     | 52.4      |
|                                                    | 1999                 | 4,399       | 2,047    | 2,352       | 46.5      |
|                                                    | 2000                 | 4,544       | 2,108    | 2,436       | 46.4      |
|                                                    | 2001                 | 4,571       | 2,089    | 2,482       | 45.7      |
|                                                    | 2002                 | 4,765       | 2,177    | 2,588       | 45.7      |
|                                                    | 2003                 | 5,080       | 2,306    | 2,774       | 45.4      |
|                                                    | 2004                 | 5,364       | 2,413    | 2,951       | 45.0      |
|                                                    | 2005                 | 5,405       | 2,443    | 2,962       | 45.2      |
|                                                    | University of Bergen | 2006        | 5,624    | 2,477       | 3,147     |
| 2007                                               |                      | 5,781       | 2,557    | 3,224       | 44.2      |
| 2008                                               |                      | 5,938       | 2,611    | 3,327       | 44.0      |
| 1991                                               |                      | 1,815       | 875      | 940         | 48.2      |
| 1992                                               |                      | 1,874       | 901      | 973         | 48.1      |
| 1993                                               |                      | 1,914       | 912      | 1,002       | 47.6      |
| 1994                                               |                      | 2,169       | 966      | 1,203       | 44.5      |
| 1995                                               |                      | 2,296       | 1,034    | 1,262       | 45.0      |
| 1996                                               |                      | 2,386       | 1,088    | 1,298       | 45.6      |
| 1997                                               |                      | 2,421       | 1,097    | 1,324       | 45.3      |
| 1998                                               |                      | 2,468       | 1,105    | 1,363       | 44.8      |
| 2000                                               |                      | 2,585       | 1,144    | 1,441       | 44.3      |
| 2002                                               |                      | 2,707       | 1,203    | 1,504       | 44.4      |
| 2004                                               | 2,849                | 1,194       | 1,655    | 41.9        |           |
| 2005                                               | 2,939                | 1,203       | 1,736    | 40.9        |           |
| 2006                                               | 3,090                | 1,246       | 1,844    | 40.3        |           |
| 2007                                               | 3,201                | 1,271       | 1,930    | 39.7        |           |
| 2008                                               | 3,327                | 1,305       | 2,022    | 39.2        |           |
| The Norwegian University of Science and Technology | 1995                 | 3,010       | 1,429    | 1,581       | 47.5      |
|                                                    | 1997                 | 3,112       | 1,468    | 1,644       | 47.2      |
|                                                    | 1998                 | 3,159       | 1,468    | 1,691       | 46.5      |
|                                                    | 2000                 | 3,352       | 1,534    | 1,818       | 45.8      |
|                                                    | 2002                 | 3,508       | 1,501    | 2,007       | 42.8      |
|                                                    | 2004                 | 4,153       | 1,643    | 2,510       | 39.6      |
|                                                    | 2005                 | 4,320       | 1,714    | 2,606       | 39.7      |
|                                                    | 2006                 | 4,287       | 1,774    | 2,513       | 41.4      |
|                                                    | 2007                 | 4,200       | 1,753    | 2,447       | 41.7      |
| 2008                                               | 4,493                | 1,808       | 2,685    | 40.2        |           |

\*Total staff in human years, including postgrads in paid positions.

†Support staff includes all nonscientific personnel.

‡Scientific personnel includes research and teaching staff.
